# Supplementary material for: Lef1-dependent Wnt/β-catenin signalling drives the proliferative engine that maintains tissue homeostasis during lateral line development
Source: Oxford University Press journal article supplement (doi:10.1242/dev.062695), 2011-08-23
Supplement: dev062695tables1.pdf [file dev062695tables1.pdf]

**Table S1. Distribution of neuromasts is affected by loss of *lef1* function**

|                                             |         | L1   | L2   | L3    | L4    | L5    | L6    | L7   | L8   |
|---------------------------------------------|---------|------|------|-------|-------|-------|-------|------|------|
| Control ( <i>n</i> =15)                     | Average | 2.9  | 9.1  | 13.2  | 17.0  | 21.7  | 26.0  | 28.7 | 30.6 |
|                                             | s.d.    | 0.57 | 0.74 | 0.63  | 1.15  | 0.82  | 1.05  | 0.67 | 0.84 |
|                                             | %       | 100  | 100  | 100   | 100   | 100   | 100   | 100  | 100  |
| <i>lef1</i> <sup>u767</sup> ( <i>n</i> =15) | Average | 2.69 | 8.62 | 12.54 | 15.42 | 17.80 |       |      |      |
|                                             | s.d.    | 0.63 | 0.65 | 1.20  | 1.51  | 1.62  |       |      |      |
|                                             | %       | 100  | 100  | 100   | 92.3  | 76    | 0     | 0    | 0    |
| <i>lef1</i> morphants ( <i>n</i> =15)       | Average | 2.54 | 8.31 | 12.15 | 15.36 | 17.71 | 19.50 |      |      |
|                                             | s.d.    | 0.66 | 0.95 | 0.80  | 1.21  | 1.25  | 0.71  |      |      |
|                                             | %       | 100  | 100  | 100   | 84.6  | 53.8  | 15.4  | 0    | 0    |

Results show the average position of neuromasts measured in somites, the standard deviation to the average (s.d.) and the percentage (%) of each deposited neuromast in control, mutants and morphants.
