# Supplementary material for: Lef1-dependent Wnt/β-catenin signalling drives the proliferative engine that maintains tissue homeostasis during lateral line development
Source: Oxford University Press journal article supplement (doi:10.1242/dev.062695), 2011-08-23
Supplement: dev062695tables2.pdf [file dev062695tables2.pdf]

**Table S2. PLLP migration distance is not affected by *lef1* loss of function**

| <b>A</b> |                 |      |          |                                   |       |          |
|----------|-----------------|------|----------|-----------------------------------|-------|----------|
|          | <b>Siblings</b> |      |          | <b><i>lef1</i><sup>u767</sup></b> |       |          |
|          | Average         | s.d. | <i>n</i> | Average                           | s.d.  | <i>n</i> |
| 27 hours | 393             | 68.5 | 15       | 344                               | 92.6  | 7        |
| 30 hours | 493             | 80   | 15       | 409                               | 108.6 | 7        |
| 33 hours | 649             | 80.7 | 15       | 555                               | 119.2 | 7        |
| 36 hours | 815             | 77.8 | 15       | 668                               | 117.9 | 7        |

  

| <b>B</b> |                 |      |          |                              |      |          |
|----------|-----------------|------|----------|------------------------------|------|----------|
|          | <b>Siblings</b> |      |          | <b><i>lef1</i> morphants</b> |      |          |
|          | Average         | s.d. | <i>n</i> | Average                      | s.d. | <i>n</i> |
| 27 hours | 412             | 57.1 | 5        | 350                          | 32.4 | 38       |
| 30 hours | 580             | 47.2 | 19       | 564                          | 31.6 | 37       |
| 33 hours | 642             | 71.1 | 19       | 620                          | 52.8 | 40       |
| 36 hours | 861             | 61.6 | 17       | 799                          | 84.9 | 48       |

Table shows average distance ( $\mu\text{m}$ ) from the caudal limit of the otic vesicle and the leading edge of the PLL primordium.

s.d., standard deviation; *n*, number of embryos counted per point.

(A) Sibling versus *lef1*<sup>u767</sup> mutant embryos.

(B) Sibling versus *lef1* morphant embryos.
