# Supplementary material for: Lef1-dependent Wnt/β-catenin signalling drives the proliferative engine that maintains tissue homeostasis during lateral line development
Source: Oxford University Press journal article supplement (doi:10.1242/dev.062695), 2011-08-23
Supplement: dev062695tables3.pdf [file dev062695tables3.pdf]

**Table S3. BrdU incorporation index in siblings and *lef1<sup>u767</sup>* mutant embryos**

|   | Sibling total count |       |          | <i>lef1<sup>u767</sup></i> total count |       |          |
|---|---------------------|-------|----------|----------------------------------------|-------|----------|
|   | Average             | s.d.  | <i>n</i> | Average                                | s.d.  | <i>n</i> |
| 1 | 0.510               | 0.094 | 8        | 0.228                                  | 0.105 | 10       |
| 2 | 0.524               | 0.098 | 8        | 0.268                                  | 0.069 | 8        |
| 3 | 0.540               | 0.061 | 8        | 0.249                                  | 0.062 | 11       |
| 4 | 0.529               | 0.098 | 8        | 0.279                                  | 0.074 | 8        |

  

|   | Sibling leading zone |       |          | <i>lef1<sup>u767</sup></i> leading zone |       |          | Sibling trailing zone |       |          | <i>lef1<sup>u767</sup></i> trailing zone |       |          |
|---|----------------------|-------|----------|-----------------------------------------|-------|----------|-----------------------|-------|----------|------------------------------------------|-------|----------|
|   | Average              | s.d.  | <i>n</i> | Average                                 | s.d.  | <i>n</i> | Average               | s.d.  | <i>n</i> | Average                                  | s.d.  | <i>n</i> |
| 1 | 0.484                | 0.134 | 8        | 0.189                                   | 0.118 | 10       | 0.327                 | 0.142 | 10       | 0.198                                    | 0.116 | 10       |
| 2 | 0.541                | 0.150 | 8        | 0.332                                   | 0.087 | 8        | 0.348                 | 0.105 | 8        | 0.307                                    | 0.137 | 8        |
| 3 | 0.513                | 0.108 | 8        | 0.170                                   | 0.116 | 11       | 0.322                 | 0.091 | 8        | 0.268                                    | 0.168 | 11       |
| 4 | 0.582                | 0.161 | 8        | 0.226                                   | 0.096 | 8        | 0.310                 | 0.143 | 8        | 0.198                                    | 0.079 | 8        |

Table shows average fraction of the number of BrdU-positive cells over the total number of cells in the PLL primordium after 1, 2, 3 and 4 deposited neuromasts in the whole primordium, leading and trailing zones.

s.d., standard deviation; *n*, number of embryos per point.
